# Supplementary figures and images for: Development of a silver functionalised polyaniline electrochemical immunosensor for polychlorinated biphenyls
Source: Royal Society of Chemistry journal article supplement (doi:10.1039/c6ay01733a), 2016-01-01

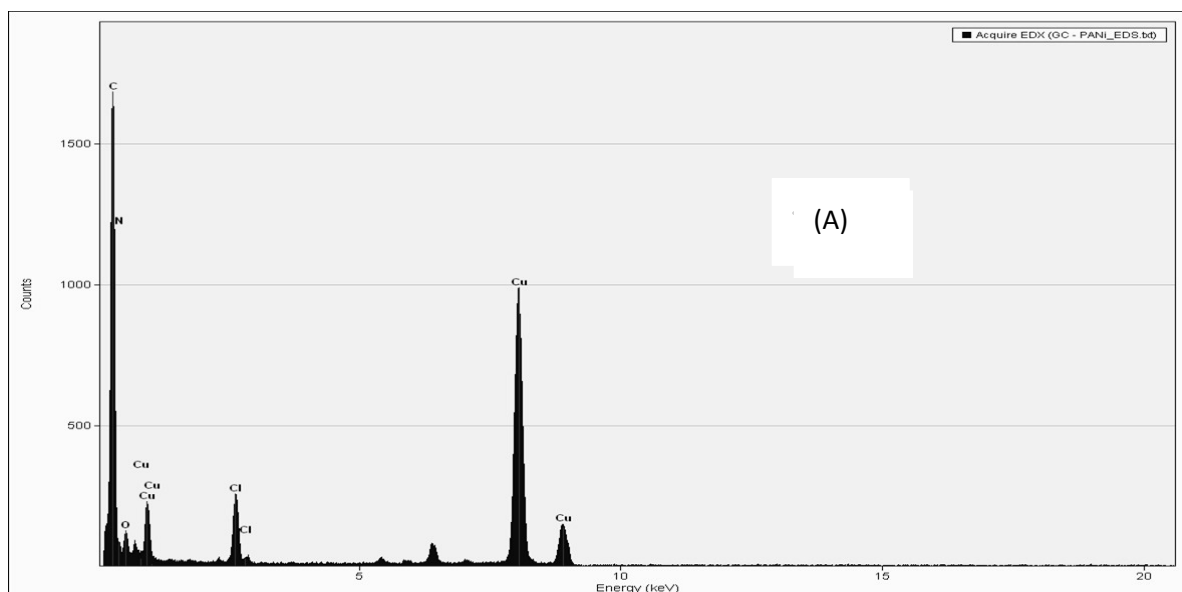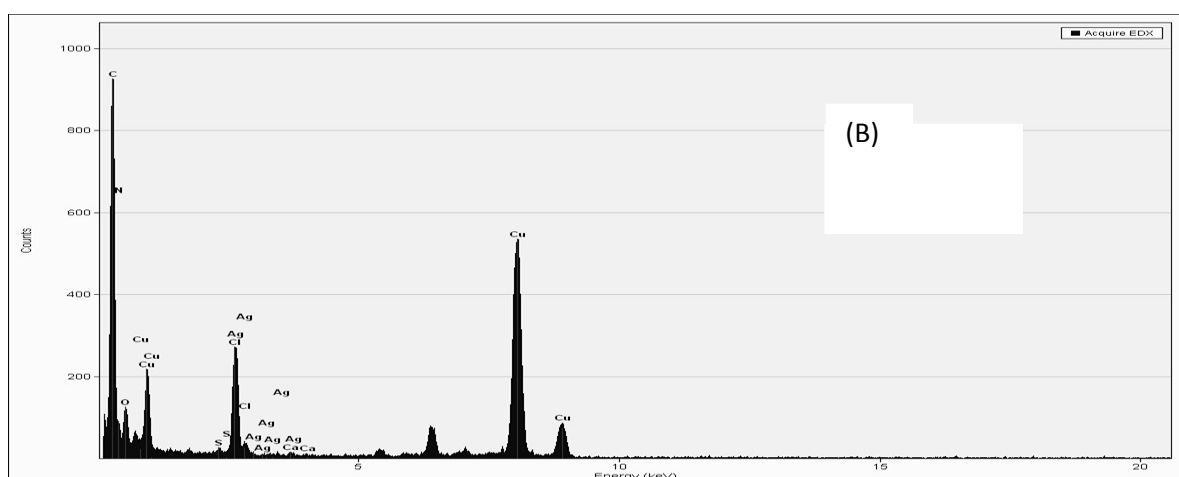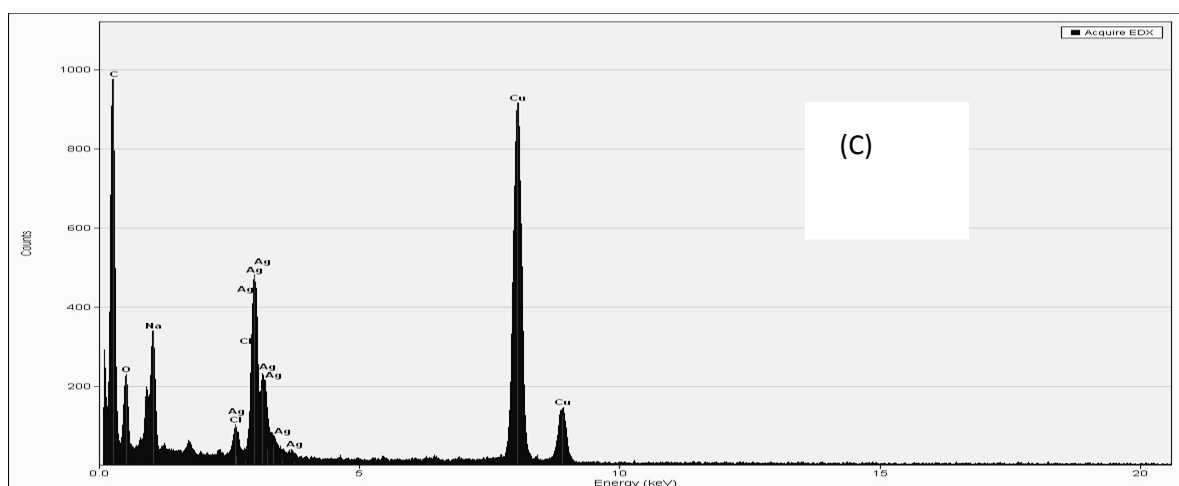

S<sub>1</sub> EDX plots of (A) PANI (B) Ag NPS-PANI and (C) Ag NPS

Supplement: c6ay01733a1.pdf [file c6ay01733a1.pdf]
